# Supplementary material for: Comparative effectiveness of BNT162b2 versus mRNA-1273 covid-19 vaccine boosting in England: matched cohort study in OpenSAFELY-TPP
Source: PubMed Central journal article supplement (PMC10014664; doi:10.1136/bmj-2022-072808), 2023-03-15
Supplement: hulw072808.ww1.pdf [file hulw072808.ww1.pdf]

# Supplementary materials for Comparative effectiveness of BNT162b2 versus mRNA-1273 boosting in England

Figure S1: Cumulative numbers included in the matched sample

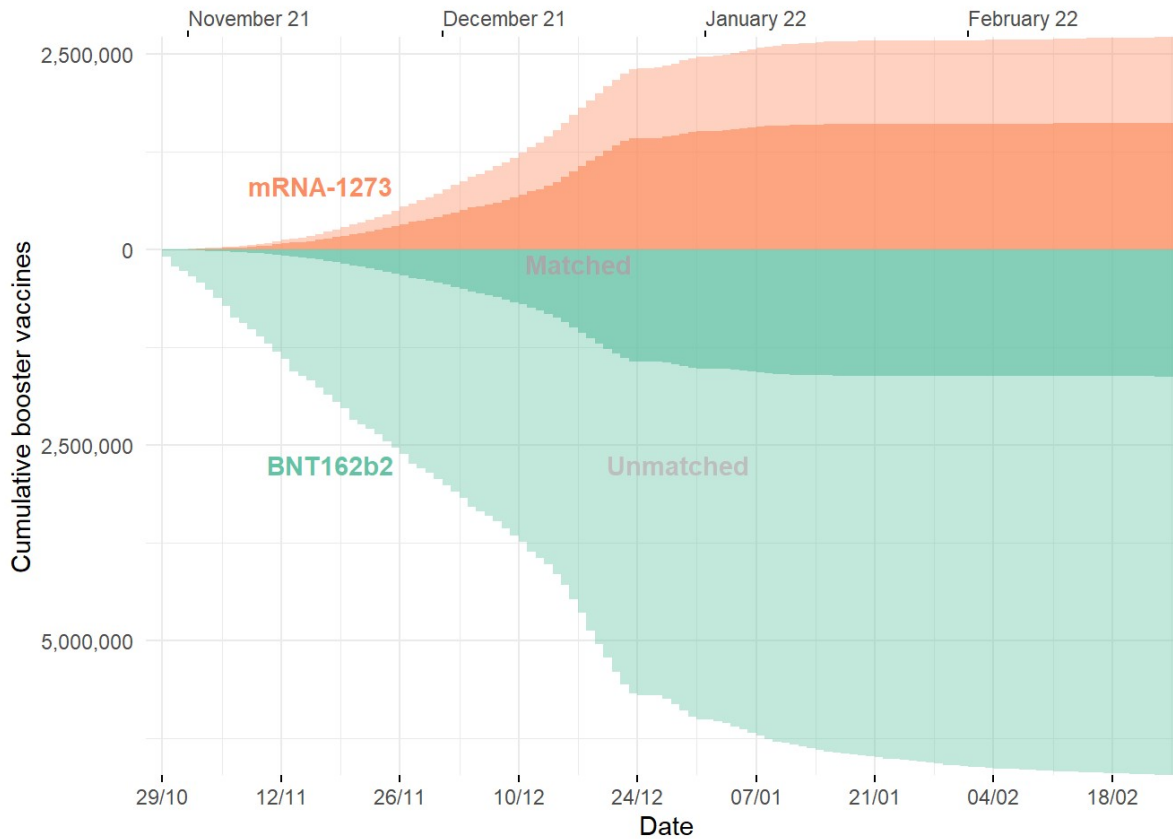

Table S1: Baseline characteristics between BNT12b2 and mRNA-1273 groups, before and after matching

| Variable                  | Before matching         |                          |        | After matching          |                          |        |
|---------------------------|-------------------------|--------------------------|--------|-------------------------|--------------------------|--------|
|                           | BNT162b2<br>(N=6721857) | mRNA-1273<br>(N=2719653) | SMD    | BNT162b2<br>(N=1618959) | mRNA-1273<br>(N=1618959) | SMD    |
| NA                        | NA                      | NA                       | NA     | NA                      | NA                       | NA     |
| BNT162b2-BNT162b2         | 2553483 (38.0)          | 816675 (30.0)            | -0.169 | 476211 (29.4)           | 476211 (29.4)            | 0.000  |
| ChAdOx1-ChAdOx1           | 4168377 (62.0)          | 1902981 (70.0)           | 0.169  | 1142745 (70.6)          | 1142745 (70.6)           | 0.000  |
| Days between dose 2 and 3 | 188.9 (31.0)            | 184.9 (29.9)             | -0.130 | 179.3 (26.9)            | 179.2 (26.8)             | -0.005 |
| Age                       | 53.1 (16.4)             | 49.6 (14.2)              | -0.225 | 49.3 (13.8)             | 49.3 (13.8)              | 0.000  |

| Variable                               |                                 | Before matching         |                          |        | After matching          |                          |        |
|----------------------------------------|---------------------------------|-------------------------|--------------------------|--------|-------------------------|--------------------------|--------|
|                                        |                                 | BNT162b2<br>(N=6721857) | mRNA-1273<br>(N=2719653) | SMD    | BNT162b2<br>(N=1618959) | mRNA-1273<br>(N=1618959) | SMD    |
| Age band                               | 18-39                           | 1711407 (25.5)          | 752691 (27.7)            | 0.050  | 448437 (27.7)           | 448437 (27.7)            | 0.000  |
|                                        | 40-49                           | 1126899 (16.8)          | 586551 (21.6)            | 0.122  | 344865 (21.3)           | 344865 (21.3)            | 0.000  |
|                                        | 50-54                           | 728643 (10.8)           | 380973 (14.0)            | 0.096  | 238179 (14.7)           | 238179 (14.7)            | 0.000  |
|                                        | 55-59                           | 750813 (11.2)           | 379107 (13.9)            | 0.084  | 235779 (14.6)           | 235779 (14.6)            | 0.000  |
|                                        | 60-64                           | 703851 (10.5)           | 300045 (11.0)            | 0.018  | 183423 (11.3)           | 183423 (11.3)            | 0.000  |
|                                        | 65-69                           | 685179 (10.2)           | 173217 (6.4)             | -0.139 | 102165 (6.3)            | 102165 (6.3)             | 0.000  |
|                                        | 70-74                           | 575607 (8.6)            | 89001 (3.3)              | -0.226 | 49305 (3.0)             | 49305 (3.0)              | 0.000  |
|                                        | 75-79                           | 263205 (3.9)            | 34965 (1.3)              | -0.166 | 13011 (0.8)             | 13011 (0.8)              | 0.000  |
|                                        | 80+                             | 176247 (2.6)            | 23091 (0.8)              | -0.136 | 3789 (0.2)              | 3789 (0.2)               | 0.000  |
| Sex                                    | Female                          | 3425607 (51.0)          | 1321665 (48.6)           | -0.047 | 770097 (47.6)           | 770097 (47.6)            | 0.000  |
|                                        | Male                            | 3296253 (49.0)          | 1397991 (51.4)           | 0.047  | 848859 (52.4)           | 848859 (52.4)            | 0.000  |
| Ethnicity                              | White                           | 5704521 (84.9)          | 2310945 (85.0)           | 0.003  | 1379673 (85.2)          | 1378173 (85.1)           | -0.003 |
|                                        | Black                           | 85809 (1.3)             | 31071 (1.1)              | -0.012 | 14901 (0.9)             | 14565 (0.9)              | -0.002 |
|                                        | South Asian                     | 372783 (5.5)            | 126777 (4.7)             | -0.040 | 70923 (4.4)             | 67365 (4.2)              | -0.011 |
|                                        | Mixed                           | 57723 (0.9)             | 23577 (0.9)              | 0.001  | 12993 (0.8)             | 13119 (0.8)              | 0.001  |
|                                        | Other                           | 110115 (1.6)            | 44133 (1.6)              | -0.001 | 24375 (1.5)             | 24939 (1.5)              | 0.003  |
|                                        | Unknown                         | 390903 (5.8)            | 183147 (6.7)             | 0.038  | 116085 (7.2)            | 120795 (7.5)             | 0.011  |
| Deprivation                            | 1 (most deprived)               | 1041159 (15.5)          | 376563 (13.8)            | -0.046 | 196185 (12.1)           | 196185 (12.1)            | 0.000  |
|                                        | 2                               | 1249545 (18.6)          | 482193 (17.7)            | -0.022 | 277887 (17.2)           | 277887 (17.2)            | 0.000  |
|                                        | 3                               | 1512507 (22.5)          | 601221 (22.1)            | -0.009 | 371733 (23.0)           | 371733 (23.0)            | 0.000  |
|                                        | 4                               | 1497663 (22.3)          | 621525 (22.9)            | 0.014  | 388203 (24.0)           | 388203 (24.0)            | 0.000  |
|                                        | 5 (least deprived)              | 1420989 (21.1)          | 638145 (23.5)            | 0.056  | 384951 (23.8)           | 384951 (23.8)            | 0.000  |
| Region                                 | North East and Yorkshire        | 1190103 (17.7)          | 499473 (18.4)            | 0.017  | 327741 (20.2)           | 327741 (20.2)            | 0.000  |
|                                        | North West                      | 530145 (7.9)            | 312927 (11.5)            | 0.123  | 162225 (10.0)           | 162225 (10.0)            | 0.000  |
|                                        | Midlands                        | 1507203 (22.4)          | 529257 (19.5)            | -0.073 | 307041 (19.0)           | 307041 (19.0)            | 0.000  |
|                                        | East of England                 | 1429497 (21.3)          | 792303 (29.1)            | 0.182  | 449895 (27.8)           | 449895 (27.8)            | 0.000  |
|                                        | London                          | 336993 (5.0)            | 157371 (5.8)             | 0.034  | 98619 (6.1)             | 98619 (6.1)              | 0.000  |
|                                        | South East                      | 556251 (8.3)            | 90747 (3.3)              | -0.212 | 59103 (3.7)             | 59103 (3.7)              | 0.000  |
|                                        | South West                      | 1171659 (17.4)          | 337575 (12.4)            | -0.141 | 214335 (13.2)           | 214335 (13.2)            | 0.000  |
| JCVI clinical risk group               | Not clinically at-risk          | 4615599 (68.7)          | 2119377 (77.9)           | 0.211  | 1403499 (86.7)          | 1403499 (86.7)           | 0.000  |
|                                        | Clinically at-risk              | 1609497 (23.9)          | 491631 (18.1)            | -0.144 | 199203 (12.3)           | 199203 (12.3)            | 0.000  |
|                                        | Clinically extremely vulnerable | 496761 (7.4)            | 108645 (4.0)             | -0.147 | 16257 (1.0)             | 16257 (1.0)              | 0.000  |
| Body Mass Index > 40 kg/m <sup>2</sup> |                                 | 280635 (4.2)            | 104361 (3.8)             | -0.017 | 20691 (1.3)             | 20661 (1.3)              | 0.000  |

| Variable                                         | Before matching         |                          |                | After matching          |                          |                |        |
|--------------------------------------------------|-------------------------|--------------------------|----------------|-------------------------|--------------------------|----------------|--------|
|                                                  | BNT162b2<br>(N=6721857) | mRNA-1273<br>(N=2719653) | SMD            | BNT162b2<br>(N=1618959) | mRNA-1273<br>(N=1618959) | SMD            |        |
| Chronic heart disease                            | 717747 (10.7)           | 184023 (6.8)             | -0.139         | 73101 (4.5)             | 73977 (4.6)              | 0.003          |        |
| Chronic kidney disease                           | 279753 (4.2)            | 53529 (2.0)              | -0.128         | 20493 (1.3)             | 20223 (1.2)              | -0.001         |        |
| Diabetes                                         | 680997 (10.1)           | 190071 (7.0)             | -0.112         | 65871 (4.1)             | 65505 (4.0)              | -0.001         |        |
| Chronic liver disease                            | 175137 (2.6)            | 59673 (2.2)              | -0.027         | 21441 (1.3)             | 21447 (1.3)              | 0.000          |        |
| Chronic respiratory disease                      | 268113 (4.0)            | 62691 (2.3)              | -0.097         | 20667 (1.3)             | 20373 (1.3)              | -0.002         |        |
| Asthma                                           | 36207 (0.5)             | 12519 (0.5)              | -0.011         | 3753 (0.2)              | 3783 (0.2)               | 0.000          |        |
| Chronic neurological disease                     | 344535 (5.1)            | 99909 (3.7)              | -0.071         | 36243 (2.2)             | 35841 (2.2)              | -0.002         |        |
| Immunosuppressed                                 | 143397 (2.1)            | 31965 (1.2)              | -0.075         | 7017 (0.4)              | 6333 (0.4)               | -0.007         |        |
| Immunosuppressed (all)                           | 341211 (5.1)            | 85659 (3.1)              | -0.097         | 24915 (1.5)             | 24435 (1.5)              | -0.002         |        |
| Asplenia or poor spleen function                 | 49383 (0.7)             | 15075 (0.6)              | -0.023         | 2805 (0.2)              | 2817 (0.2)               | 0.000          |        |
| Cancer (excluding haem), within previous 3 years | 162375 (2.4)            | 40629 (1.5)              | -0.067         | 15621 (1.0)             | 15741 (1.0)              | 0.001          |        |
| Haematological cancer, within previous 3 years   | 18399 (0.3)             | 2979 (0.1)               | -0.038         | 1029 (0.1)              | 861 (0.1)                | -0.004         |        |
| Solid organ transplant                           | 7197 (0.1)              | 1245 (0.0)               | -0.022         | 273 (0.0)               | 225 (0.0)                | -0.002         |        |
| Immunosuppressive medications, within 6 months   | 60633 (0.9)             | 12153 (0.4)              | -0.056         | 2865 (0.2)              | 2391 (0.1)               | -0.007         |        |
| HIV/AIDS                                         | 621 (0.0)               | 123 (0.0)                | -0.006         | 15 (0.0)                | 21 (0.0)                 | 0.001          |        |
| Morbidity count                                  |                         |                          |                |                         |                          |                |        |
|                                                  | 0                       | 4675107 (69.6)           | 2116401 (77.8) | 0.189                   | 1399287 (86.4)           | 1399287 (86.4) | 0.000  |
|                                                  | 1                       | 1403889 (20.9)           | 454713 (16.7)  | -0.107                  | 177387 (11.0)            | 177387 (11.0)  | 0.000  |
|                                                  | 2+                      | 642861 (9.6)             | 148533 (5.5)   | -0.156                  | 42285 (2.6)              | 42285 (2.6)    | 0.000  |
| Learning disabilities                            |                         | 44943 (0.7)              | 12939 (0.5)    | -0.026                  | 2997 (0.2)               | 2157 (0.1)     | -0.013 |
| Serious mental illness                           |                         | 65949 (1.0)              | 22449 (0.8)    | -0.016                  | 4869 (0.3)               | 4431 (0.3)     | -0.005 |
| Number of SARS-CoV-2 tests                       |                         |                          |                |                         |                          |                |        |
|                                                  | 0                       | 3395073 (50.5)           | 1261551 (46.4) | -0.083                  | 786687 (48.6)            | 758883 (46.9)  | -0.034 |
|                                                  | 1                       | 1251495 (18.6)           | 528513 (19.4)  | 0.021                   | 313875 (19.4)            | 313647 (19.4)  | 0.000  |
|                                                  | 2                       | 632631 (9.4)             | 278289 (10.2)  | 0.028                   | 158841 (9.8)             | 162681 (10.0)  | 0.008  |
|                                                  | 3+                      | 1442661 (21.5)           | 651303 (23.9)  | 0.059                   | 359547 (22.2)            | 383745 (23.7)  | 0.036  |
| Prior documented SARS-CoV-2 infection            |                         | 882525 (13.1)            | 387447 (14.2)  | 0.033                   | 149685 (9.2)             | 149685 (9.2)   | 0.000  |

Figure S2: Standardised Mean Differences between BNT12b2 and mRNA-1273 groups, before and after matching

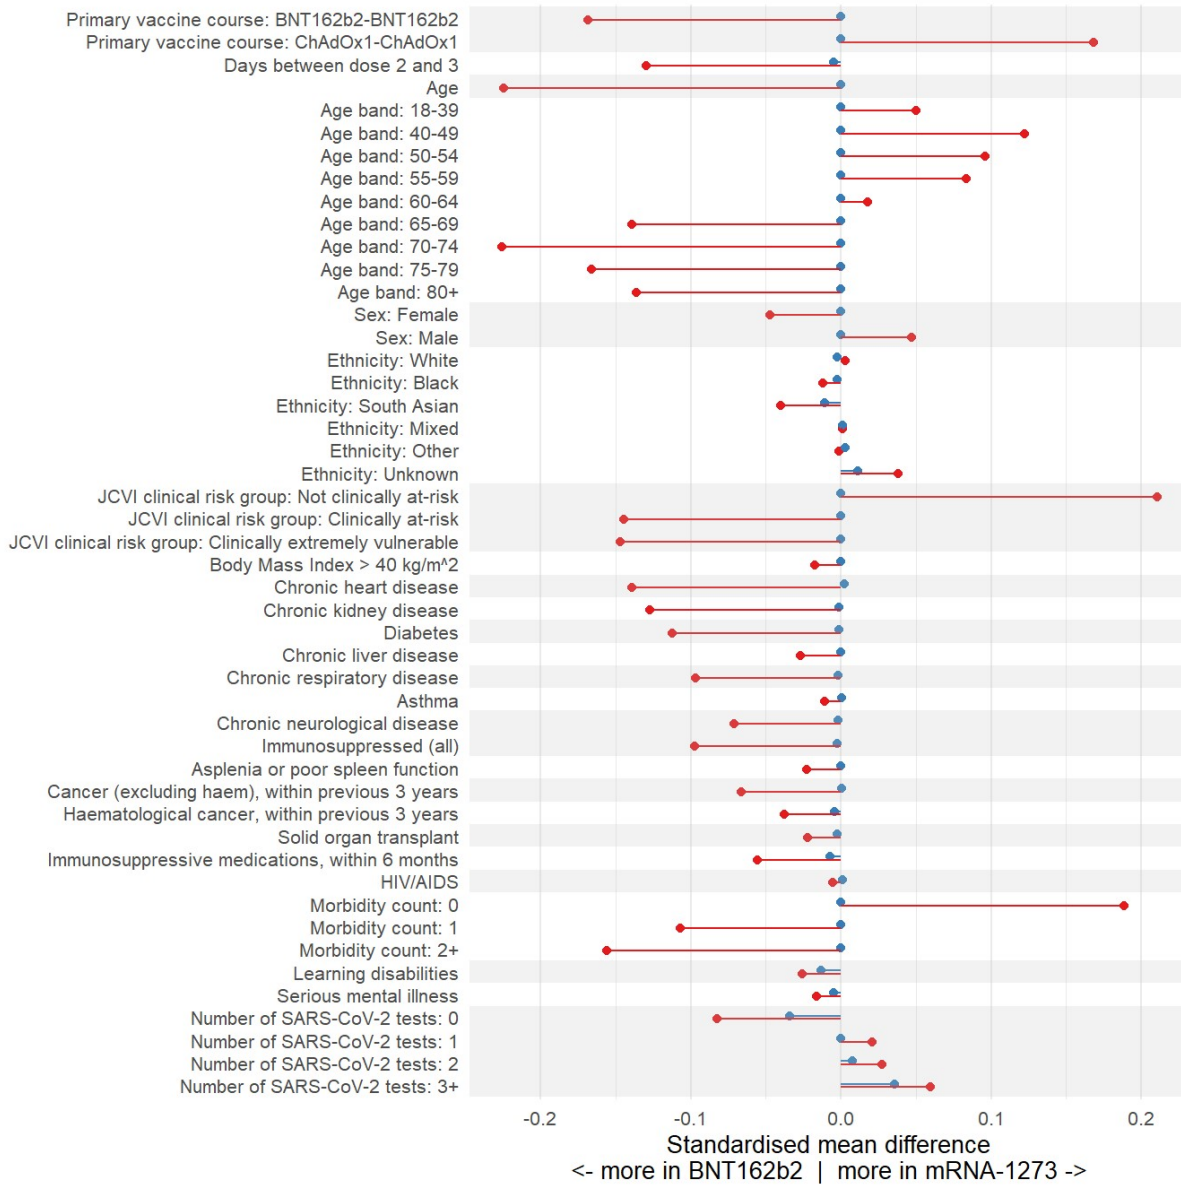

**Table S2: 20-week risk differences, risk ratios, and Cox hazard ratios, with p-values for subgroup heterogeneity**

| Sub-group                         |                                 | Risk difference per 1,000 people (95% CI) | P-value | Risk ratio (95% CI) | P-value | Hazard ratio (95% CI) | P-value |
|-----------------------------------|---------------------------------|-------------------------------------------|---------|---------------------|---------|-----------------------|---------|
| <b>Positive SARS-CoV-2 test</b>   |                                 |                                           |         |                     |         |                       |         |
| Main                              |                                 | -4.25 (-5.53 to -2.98)                    |         | 0.97 (0.97-0.98)    |         | 0.95 (0.95 to 0.96)   |         |
| Primary vaccine course            | ChAdOx1-S                       | -2.73 (-4.19 to -1.27)                    | <0.001  | 0.98 (0.97-0.99)    | <0.001  | 0.96 (0.96 to 0.97)   | <0.001  |
|                                   | BNT162b2                        | -8.73 (-11.3 to -6.12)                    |         | 0.95 (0.94-0.97)    |         | 0.93 (0.92 to 0.94)   |         |
| Age-band                          | 18-39                           | -8.20 (-20.9 to 4.52)                     | 0.578   | 0.97 (0.92-1.02)    | 0.724   | 0.93 (0.92 to 0.94)   | <0.001  |
|                                   | 40-54                           | -2.53 (-7.11 to 2.05)                     |         | 0.99 (0.97-1.01)    |         | 0.96 (0.96 to 0.97)   |         |
|                                   | 55-64                           | -2.84 (-5.52 to -0.17)                    |         | 0.98 (0.96-1.00)    |         | 0.96 (0.95 to 0.98)   |         |
|                                   | 65-74                           | -0.77 (-2.79 to 1.25)                     |         | 0.99 (0.96-1.02)    |         | 0.98 (0.96 to 1.01)   |         |
|                                   | 75+                             | -2.71 (-6.42 to 1.00)                     |         | 0.94 (0.86-1.02)    |         | 0.91 (0.83 to 0.99)   |         |
| Prior SARS-CoV-2 infection status | No prior SARS-CoV-2 infection   | -4.39 (-5.71 to -3.08)                    | 0.873   | 0.97 (0.97-0.98)    | 0.365   | 0.95 (0.95 to 0.96)   | 0.066   |
|                                   | Prior SARS-CoV-2 infection      | -4.82 (-9.86 to 0.23)                     |         | 0.95 (0.90-1.00)    |         | 0.93 (0.90 to 0.96)   |         |
| Clinical vulnerability            | Not clinically at-risk          | -4.48 (-6.07 to -2.90)                    | 0.139   | 0.97 (0.97-0.98)    | 0.290   | 0.95 (0.94 to 0.96)   | 0.061   |
|                                   | Clinically at-risk              | -2.06 (-4.52 to 0.41)                     |         | 0.98 (0.96-1.00)    |         | 0.97 (0.95 to 0.99)   |         |
|                                   | Clinically extremely vulnerable | -8.39 (-16.2 to -0.54)                    |         | 0.93 (0.87-1.00)    |         | 0.92 (0.86 to 0.98)   |         |
| <b>COVID-19 hospitalisation</b>   |                                 |                                           |         |                     |         |                       |         |
| Main                              |                                 | -0.10 (-0.16 to -0.046)                   |         | 0.86 (0.79-0.94)    |         | 0.89 (0.82 to 0.95)   |         |
| Primary vaccine course            | ChAdOx1-S                       | -0.100 (-0.17 to -0.030)                  | 0.832   | 0.87 (0.79-0.96)    | 0.642   | 0.89 (0.82 to 0.97)   | 0.690   |
|                                   | BNT162b2                        | -0.11 (-0.21 to -0.012)                   |         | 0.83 (0.71-0.98)    |         | 0.86 (0.75 to 1.00)   |         |
| Age-band                          | 18-39                           | -0.055 (-0.14 to 0.028)                   | 0.158   | 0.86 (0.69-1.08)    | 0.146   | 0.86 (0.70 to 1.05)   | 0.120   |
|                                   | 40-54                           | -0.066 (-0.15 to 0.016)                   |         | 0.87 (0.74-1.03)    |         | 0.88 (0.75 to 1.02)   |         |
|                                   | 55-64                           | -0.22 (-0.33 to -0.11)                    |         | 0.72 (0.62-0.85)    |         | 0.77 (0.67 to 0.89)   |         |
|                                   | 65-74                           | -0.054 (-0.30 to 0.19)                    |         | 0.96 (0.81-1.14)    |         | 1.01 (0.87 to 1.17)   |         |
|                                   | 75+                             | -0.27 (-1.54 to 1.00)                     |         | 0.95 (0.75-1.20)    |         | 0.96 (0.79 to 1.17)   |         |
| Prior SARS-CoV-2 infection status | No prior SARS-CoV-2 infection   | -0.10 (-0.16 to -0.040)                   | 0.405   | 0.87 (0.80-0.95)    | 0.067   | 0.90 (0.84 to 0.97)   | 0.047   |
|                                   | Prior SARS-CoV-2 infection      | -0.16 (-0.29 to -0.036)                   |         | 0.58 (0.38-0.89)    |         | 0.61 (0.42 to 0.89)   |         |
| Clinical vulnerability            | Not clinically at-risk          | -0.064 (-0.11 to -0.015)                  | 0.060   | 0.86 (0.77-0.97)    | 0.837   | 0.89 (0.81 to 0.98)   | 0.820   |
|                                   | Clinically at-risk              | -0.39 (-0.67 to -0.11)                    |         | 0.83 (0.72-0.95)    |         | 0.86 (0.77 to 0.98)   |         |
|                                   | Clinically extremely vulnerable | -0.75 (-2.51 to 1.00)                     |         | 0.89 (0.68-1.17)    |         | 0.94 (0.74 to 1.18)   |         |
| <b>COVID-19 death</b>             |                                 |                                           |         |                     |         |                       |         |
| Main                              |                                 | -0.004 (-0.015 to 0.007)                  |         | 0.87 (0.56-1.33)    |         | 0.83 (0.58 to 1.19)   |         |
| Primary vaccine course            | ChAdOx1-S                       | -0.005 (-0.019 to 0.008)                  | 0.545   | 0.82 (0.49-1.36)    | 0.527   | 0.81 (0.53 to 1.24)   | 0.822   |

| Sub-group                         |                                 | Risk difference per 1,000 people (95% CI) | P-value | Risk ratio (95% CI) | P-value | Hazard ratio (95% CI) | P-value |
|-----------------------------------|---------------------------------|-------------------------------------------|---------|---------------------|---------|-----------------------|---------|
|                                   | BNT162b2                        | -0.013 (-0.033 to 0.008)                  |         | 0.60 (0.26-1.37)    |         | 0.89 (0.45 to 1.75)   |         |
| Age-band                          | 18-39                           | 0.007 (-0.001 to 0.016)                   | 0.116   | Inf (NA-NA)         |         | 3.02 (0.31 to 29.06)  | 0.567   |
|                                   | 40-54                           | -0.011 (-0.023 to 0.001)                  |         | 0.33 (0.09-1.23)    |         | 0.75 (0.26 to 2.16)   |         |
|                                   | 55-64                           | 0.000 (-0.019 to 0.019)                   |         | 1.00 (0.40-2.51)    |         | 0.66 (0.30 to 1.48)   |         |
|                                   | 65-74                           | 0.000 (-0.046 to 0.047)                   |         | 1.01 (0.40-2.54)    |         | 0.64 (0.33 to 1.25)   |         |
|                                   | 75+                             | -0.24 (-0.61 to 0.14)                     |         | 0.60 (0.26-1.36)    |         | 1.09 (0.60 to 2.00)   |         |
| Prior SARS-CoV-2 infection status | No prior SARS-CoV-2 infection   | -0.008 (-0.020 to 0.004)                  | 0.030   | 0.73 (0.47-1.15)    |         | 0.83 (0.58 to 1.19)   | 0.897   |
|                                   | Prior SARS-CoV-2 infection      | 0.020 (-0.003 to 0.043)                   |         | Inf (NA-NA)         |         | 1.00 (0.06 to 15.98)  |         |
| Clinical vulnerability            | Not clinically at-risk          | 0.000 (-0.008 to 0.008)                   | 0.184   | 1.00 (0.49-2.04)    | 0.448   | 0.90 (0.48 to 1.70)   | 0.850   |
|                                   | Clinically at-risk              | -0.060 (-0.12 to 0.003)                   |         | 0.56 (0.30-1.04)    |         | 0.74 (0.43 to 1.27)   |         |
|                                   | Clinically extremely vulnerable | 0.000 (-0.30 to 0.30)                     |         | 1.00 (0.20-4.95)    |         | 0.93 (0.45 to 1.93)   |         |
| <b>Non-COVID-19 death</b>         |                                 |                                           |         |                     |         |                       |         |
| Main                              |                                 | -0.078 (-0.13 to -0.023)                  |         | 0.88 (0.81-0.96)    |         | 0.92 (0.86 to 0.99)   |         |
| Primary vaccine course            | ChAdOx1-S                       | -0.063 (-0.13 to 0.006)                   | 0.374   | 0.91 (0.83-1.01)    | 0.158   | 0.94 (0.86 to 1.02)   | 0.285   |
|                                   | BNT162b2                        | -0.11 (-0.20 to -0.026)                   |         | 0.78 (0.65-0.95)    |         | 0.85 (0.73 to 0.99)   |         |
| Age-band                          | 18-39                           | 0.000 (-0.035 to 0.035)                   | 0.007   | 1.01 (0.59-1.71)    | 0.168   | 1.11 (0.68 to 1.82)   | 0.065   |
|                                   | 40-54                           | 0.010 (-0.050 to 0.070)                   |         | 1.04 (0.83-1.31)    |         | 1.07 (0.88 to 1.30)   |         |
|                                   | 55-64                           | -0.098 (-0.21 to 0.010)                   |         | 0.87 (0.74-1.02)    |         | 0.88 (0.77 to 1.01)   |         |
|                                   | 65-74                           | -0.15 (-0.44 to 0.14)                     |         | 0.93 (0.80-1.07)    |         | 0.97 (0.86 to 1.09)   |         |
|                                   | 75+                             | -2.37 (-3.85 to -0.90)                    |         | 0.72 (0.59-0.88)    |         | 0.76 (0.64 to 0.90)   |         |
| Prior SARS-CoV-2 infection status | No prior SARS-CoV-2 infection   | -0.073 (-0.13 to -0.014)                  | 0.431   | 0.90 (0.82-0.98)    | 0.063   | 0.93 (0.87 to 1.00)   | 0.046   |
|                                   | Prior SARS-CoV-2 infection      | -0.12 (-0.22 to -0.019)                   |         | 0.54 (0.32-0.92)    |         | 0.59 (0.38 to 0.92)   |         |
| Clinical vulnerability            | Not clinically at-risk          | -0.004 (-0.045 to 0.037)                  | <0.001  | 0.99 (0.86-1.13)    | 0.022   | 1.02 (0.91 to 1.13)   | 0.041   |
|                                   | Clinically at-risk              | -0.33 (-0.63 to -0.034)                   |         | 0.87 (0.76-0.99)    |         | 0.88 (0.79 to 0.98)   |         |
|                                   | Clinically extremely vulnerable | -3.33 (-5.33 to -1.33)                    |         | 0.67 (0.53-0.85)    |         | 0.78 (0.64 to 0.96)   |         |

Table S3: Summary of follow-up time, including time beyond 20 weeks where available

| Vaccine                         | Weeks of follow-up |      |        |      |      |
|---------------------------------|--------------------|------|--------|------|------|
|                                 | Total              | Mean | Median | Q1   | Q3   |
| <b>Positive SARS-CoV-2 test</b> |                    |      |        |      |      |
| BNT162b2                        | 24 008 759.6       | 14.8 | 15.3   | 14.3 | 17.1 |
| mRNA-1273                       | 24 120 247.3       | 14.9 | 15.3   | 14.3 | 17.1 |
| Both                            | 48 129 006.9       | 14.9 | 15.3   | 14.3 | 17.1 |
| <b>COVID-19 hospitalisation</b> |                    |      |        |      |      |
| BNT162b2                        | 44 540 421.0       | 27.5 | 28.0   | 27.7 | 28.0 |
| mRNA-1273                       | 44 508 452.1       | 27.5 | 28.0   | 27.7 | 28.0 |
| Both                            | 89 048 873.1       | 27.5 | 28.0   | 27.7 | 28.0 |
| <b>COVID-19 death</b>           |                    |      |        |      |      |
| BNT162b2                        | 44 560 983.0       | 27.5 | 28.0   | 27.7 | 28.0 |
| mRNA-1273                       | 44 525 580.4       | 27.5 | 28.0   | 27.7 | 28.0 |
| Both                            | 89 086 563.4       | 27.5 | 28.0   | 27.7 | 28.0 |
| <b>Non-COVID-19 death</b>       |                    |      |        |      |      |
| BNT162b2                        | 44 560 983.0       | 27.5 | 28.0   | 27.7 | 28.0 |
| mRNA-1273                       | 44 525 580.4       | 27.5 | 28.0   | 27.7 | 28.0 |
| Both                            | 89 086 563.4       | 27.5 | 28.0   | 27.7 | 28.0 |

Table S4: Testing rates after baseline, up administrative censoring on 31 March 2022

| Sub-group                         |                                 | BNT162b2     |           |                | mRNA-1273    |           |                |
|-----------------------------------|---------------------------------|--------------|-----------|----------------|--------------|-----------|----------------|
|                                   |                                 | Person-weeks | All tests | Positive tests | Person-weeks | All tests | Positive tests |
| Main                              |                                 | 25 832 089   | 0.139     | 0.012          | 25 833 080   | 0.151     | 0.012          |
| Primary vaccine course            | ChAdOx1-S                       | 18 712 821   | 0.147     | 0.011          | 18 713 232   | 0.159     | 0.011          |
|                                   | BNT162b2                        | 7 119 268    | 0.121     | 0.015          | 7 119 848    | 0.129     | 0.014          |
| Age-band                          | 18-39                           | 5 917 556    | 0.119     | 0.017          | 5 885 055    | 0.125     | 0.016          |
|                                   | 40-54                           | 8 604 362    | 0.155     | 0.014          | 8 624 133    | 0.170     | 0.014          |
|                                   | 55-64                           | 7 430 046    | 0.153     | 0.010          | 7 464 086    | 0.165     | 0.009          |
|                                   | 65-74                           | 3 379 514    | 0.115     | 0.006          | 3 355 995    | 0.126     | 0.006          |
|                                   | 75+                             | 500 612      | 0.066     | 0.004          | 503 811      | 0.065     | 0.003          |
| Prior SARS-CoV-2 infection status | No prior SARS-CoV-2 infection   | 23 580 833   | 0.140     | 0.013          | 23 581 707   | 0.151     | 0.013          |
|                                   | Prior SARS-CoV-2 infection      | 2 251 257    | 0.135     | 0.006          | 2 251 373    | 0.147     | 0.006          |
| Clinical vulnerability            | Not clinically at-risk          | 21 998 618   | 0.143     | 0.013          | 21 998 713   | 0.154     | 0.012          |
|                                   | Clinically at-risk              | 3 535 571    | 0.123     | 0.009          | 3 536 059    | 0.134     | 0.009          |
|                                   | Clinically extremely vulnerable | 297 901      | 0.109     | 0.009          | 298 309      | 0.111     | 0.009          |



# Cumulative incidences by subgroup

Figure S3a: Cumulative incidence estimates per 1,000 people

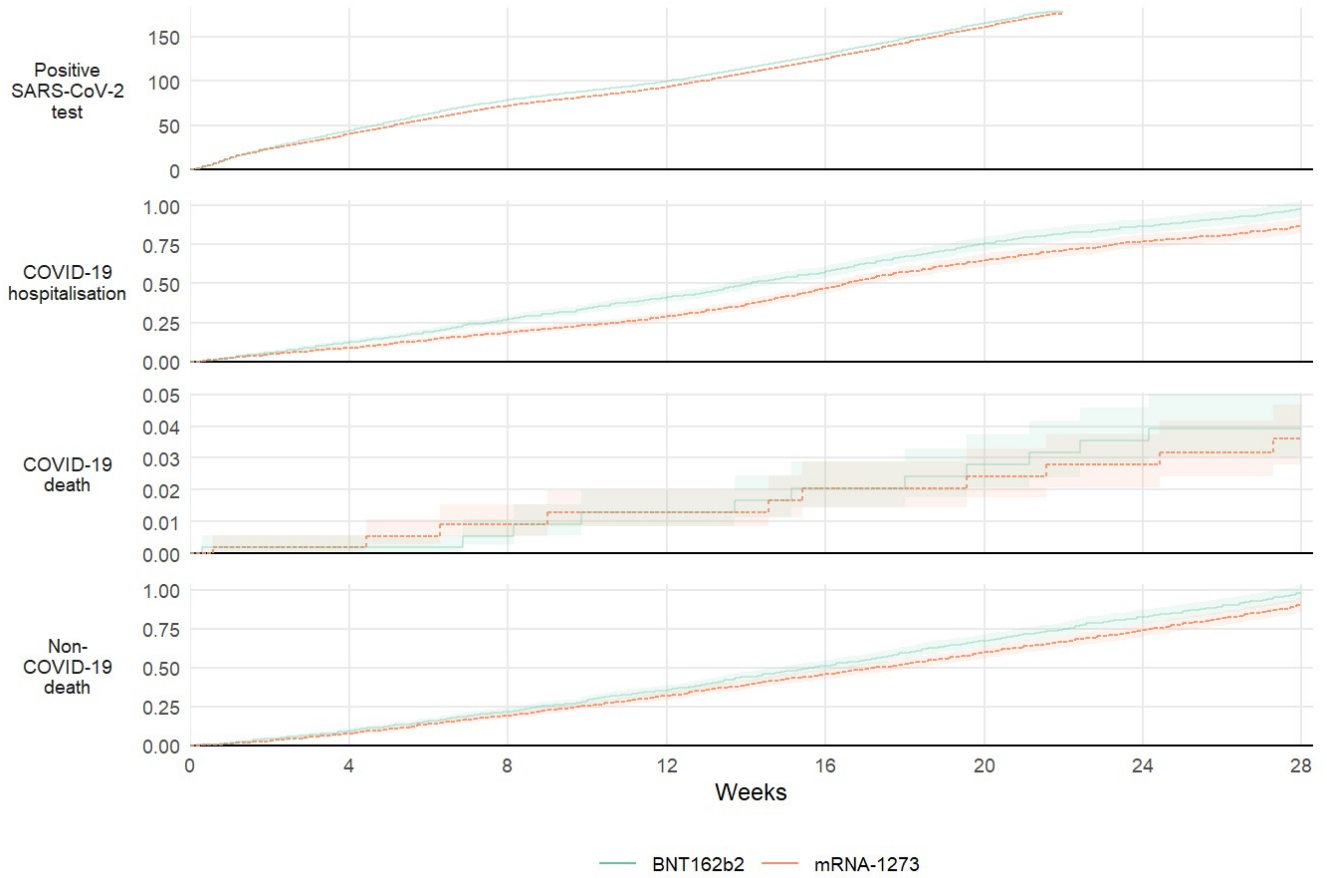

Figure S3b: Cumulative incidence estimates per 1,000 people by primary course type

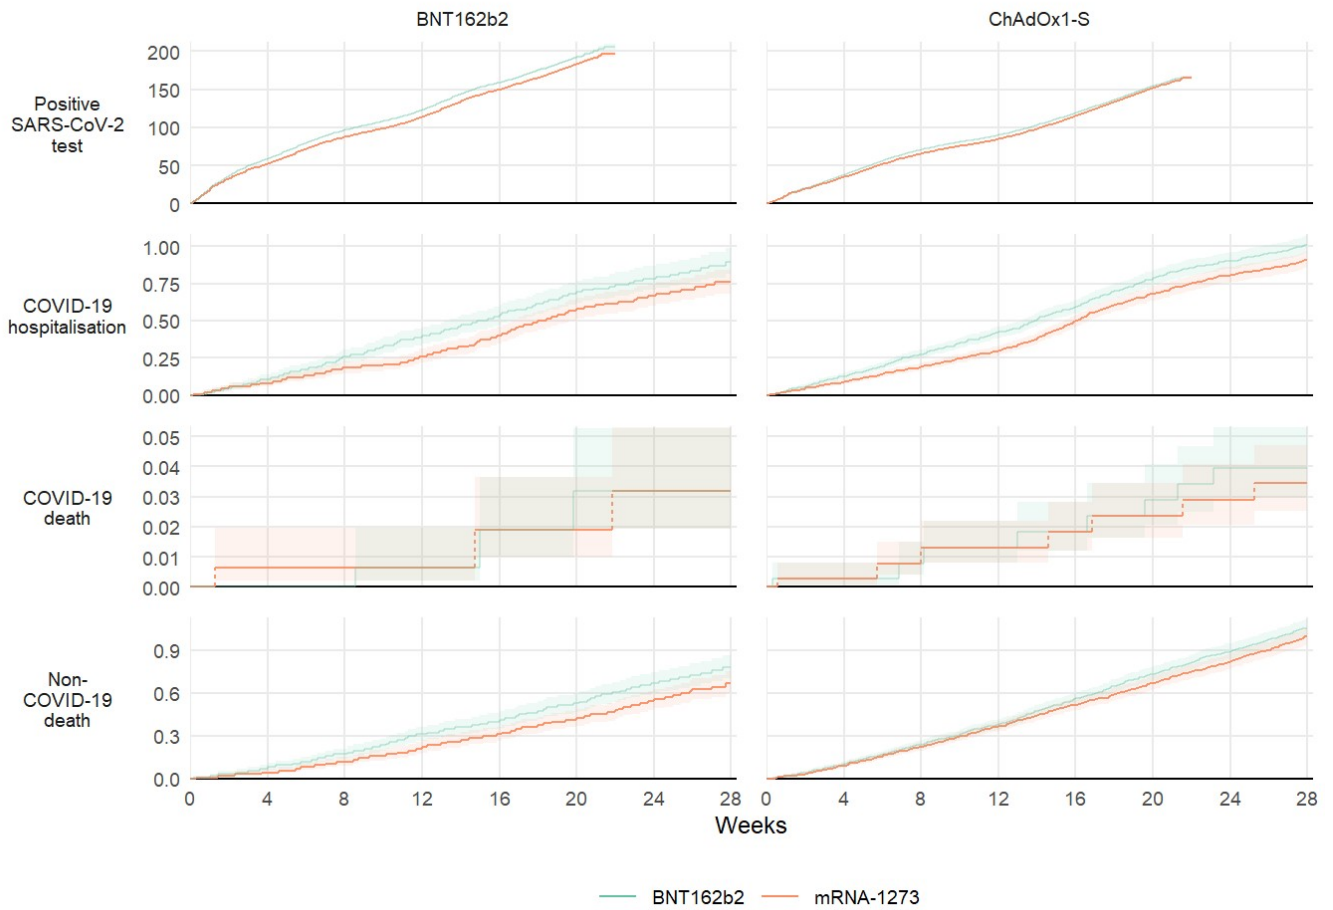

Figure S3c: Cumulative incidence estimates per 1,000 people by age group

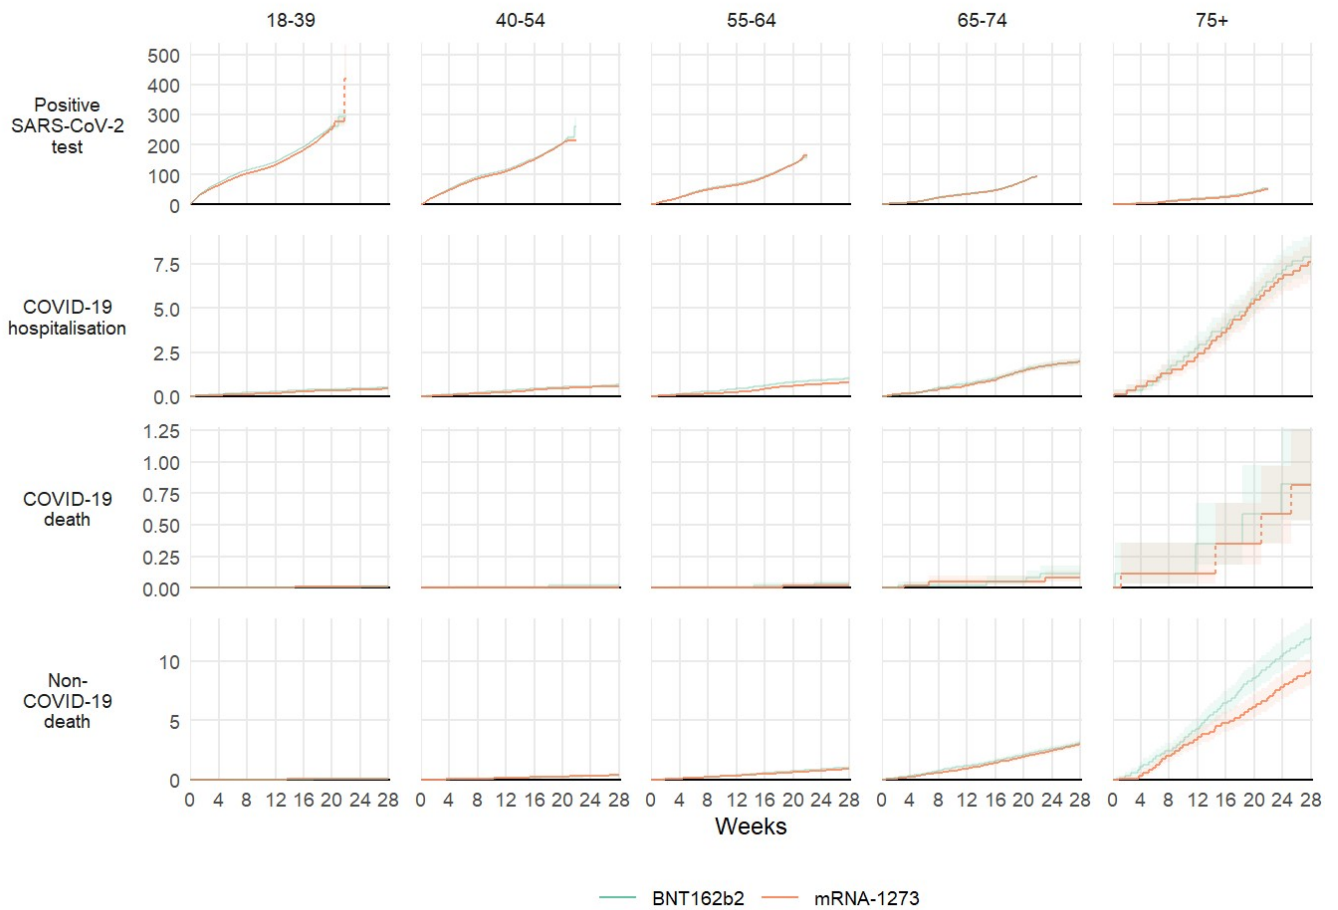

Figure S3d: Cumulative incidence estimates per 1,000 people by prior infection

status

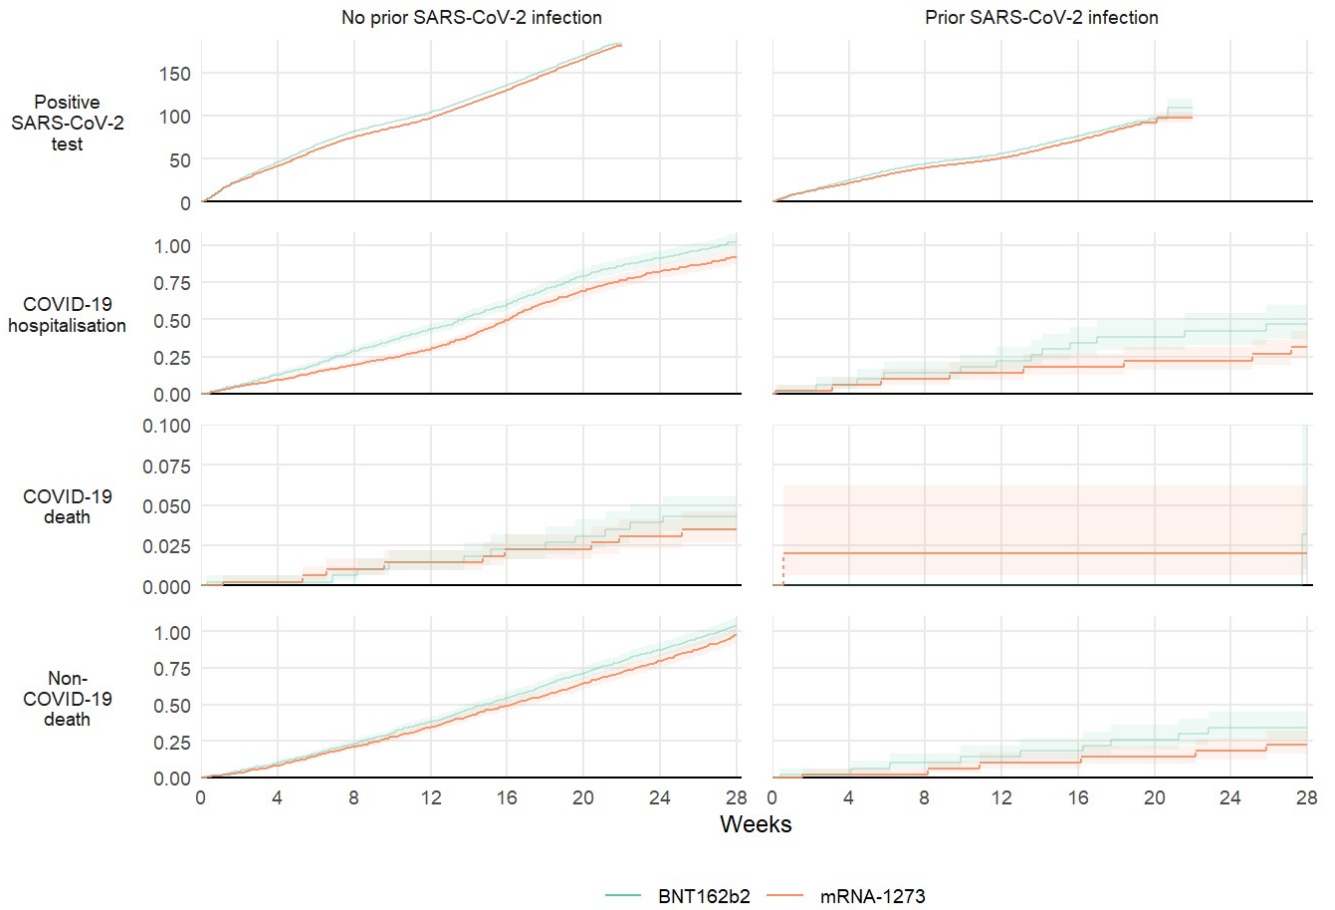

Figure S3e: Cumulative incidence estimates per 1,000 people by clinical vulnerability

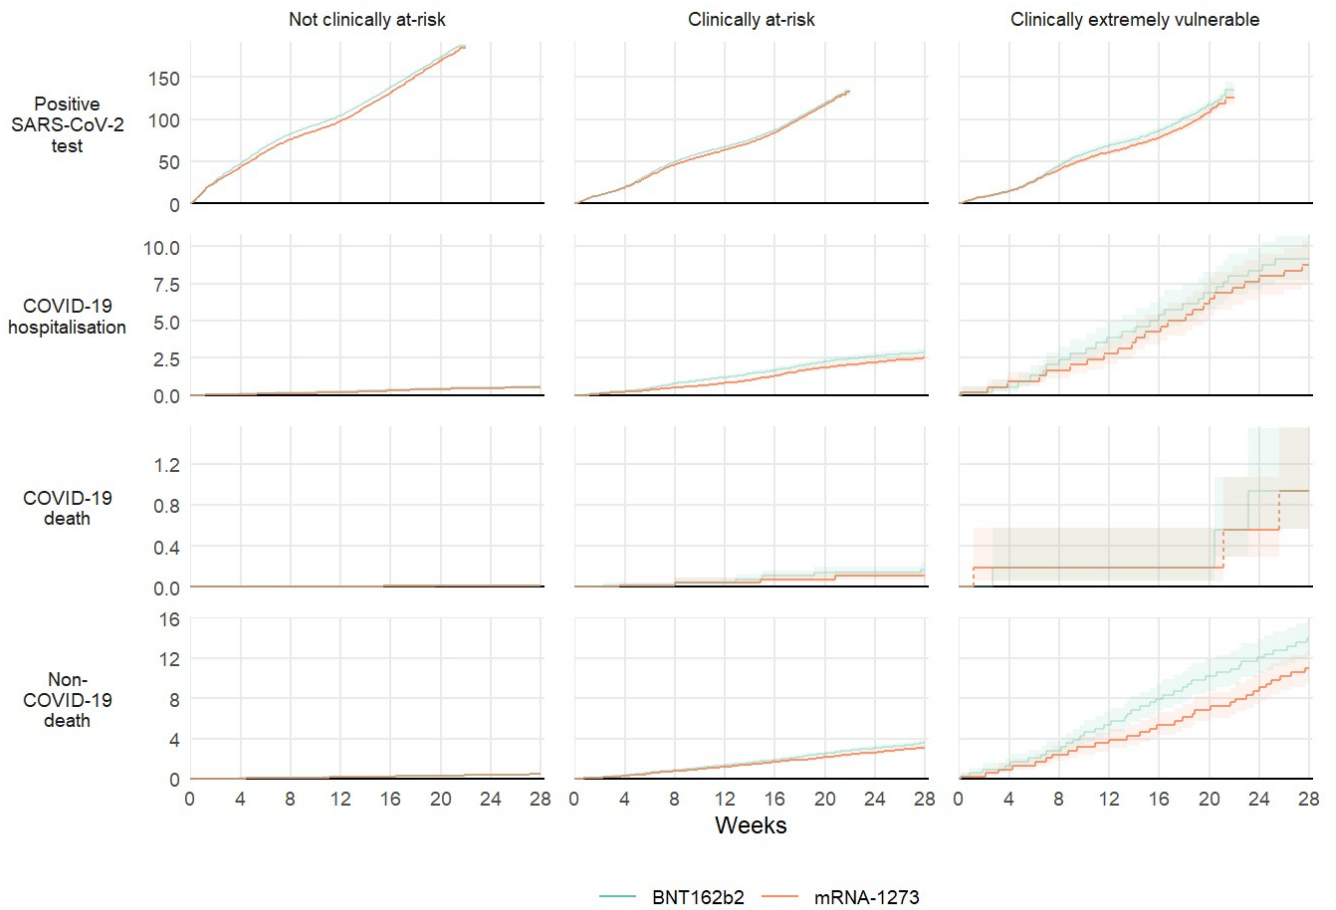

## Comparisons by subgroup

Figure S4a: Cumulative risk difference, cumulative risk ratio, and period-specific hazard ratios

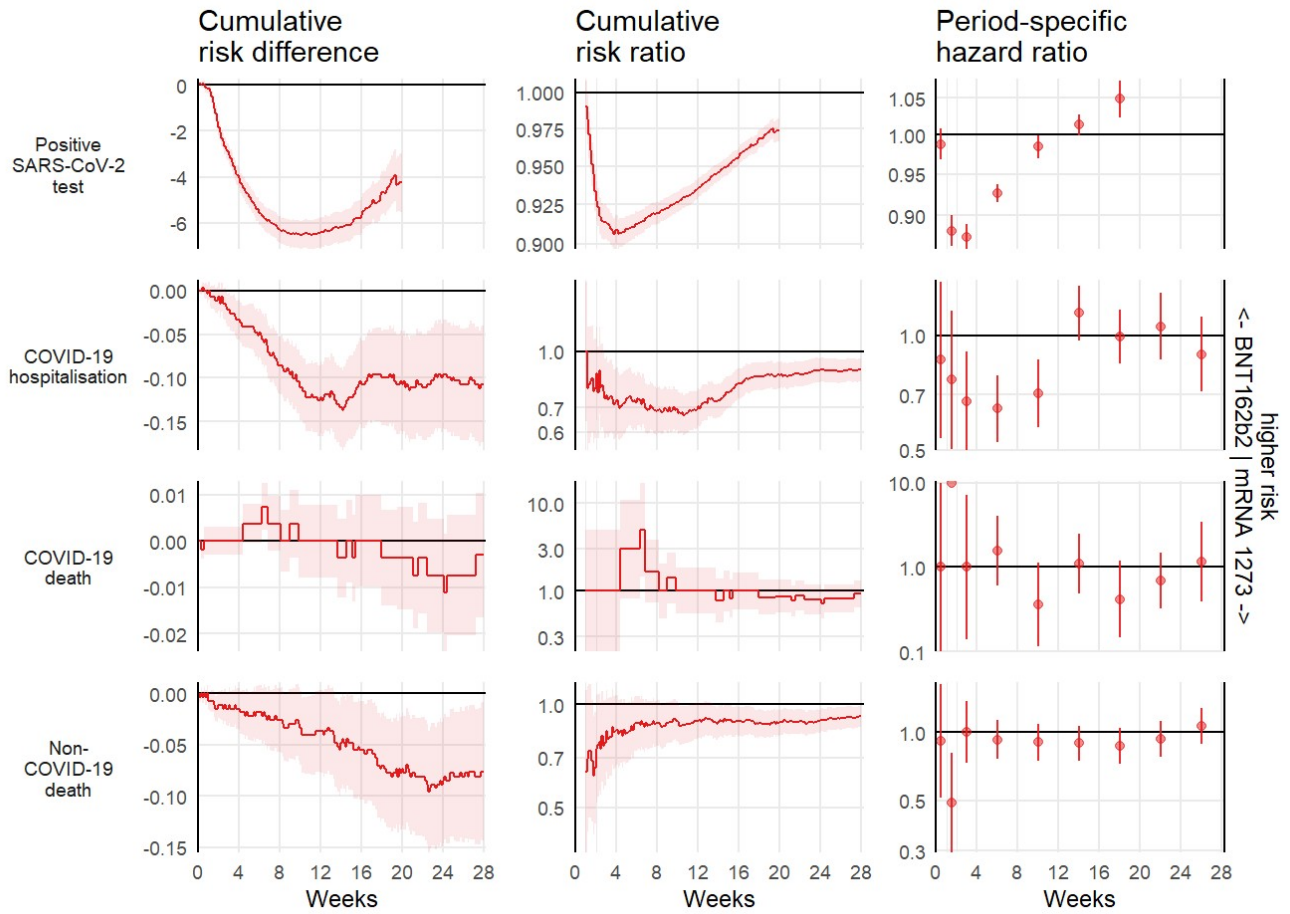

Figure S4b: Cumulative risk difference, cumulative risk ratio, and period-specific hazard ratios by primary course type

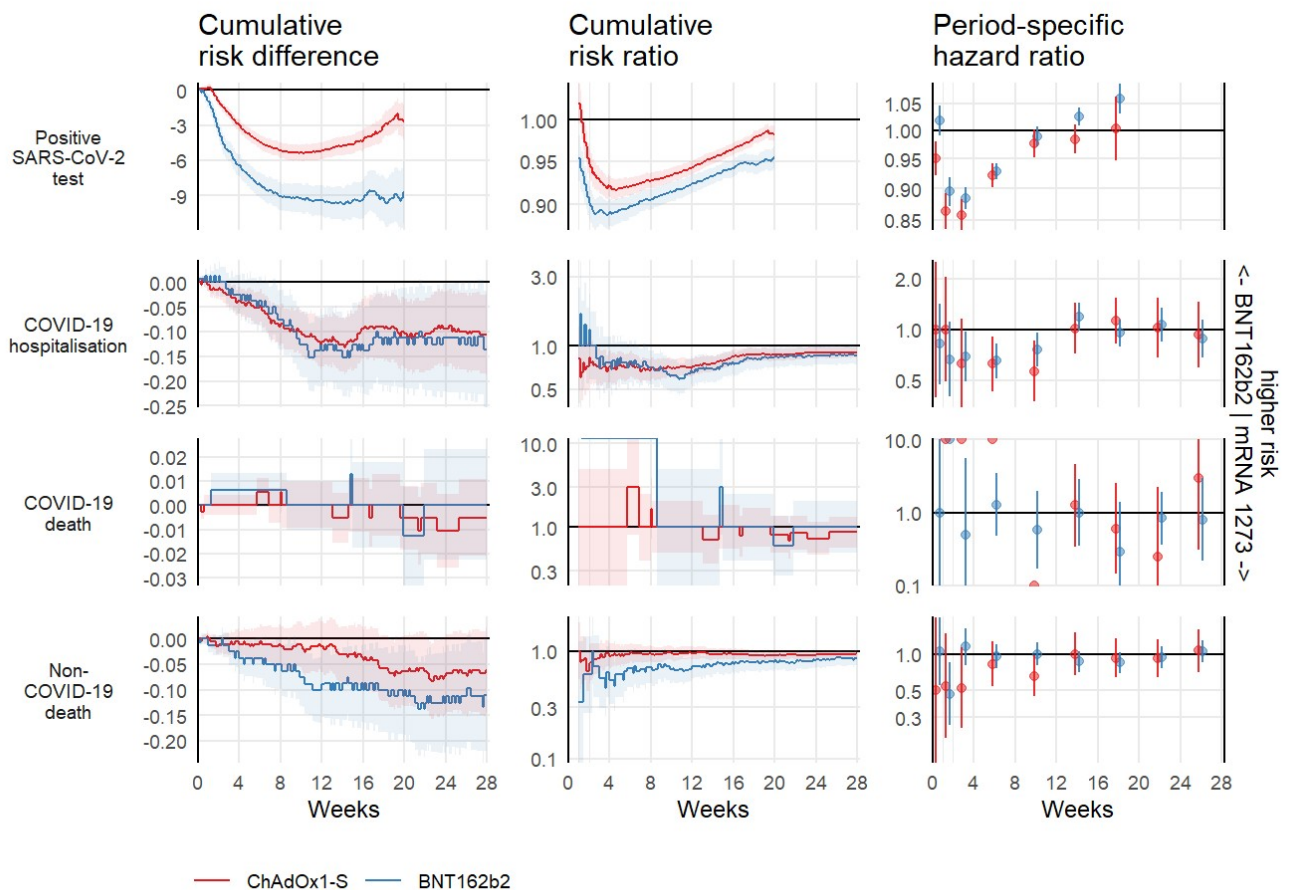

Figure S4c: Cumulative risk difference, cumulative risk ratio, and period-specific hazard ratios by age group

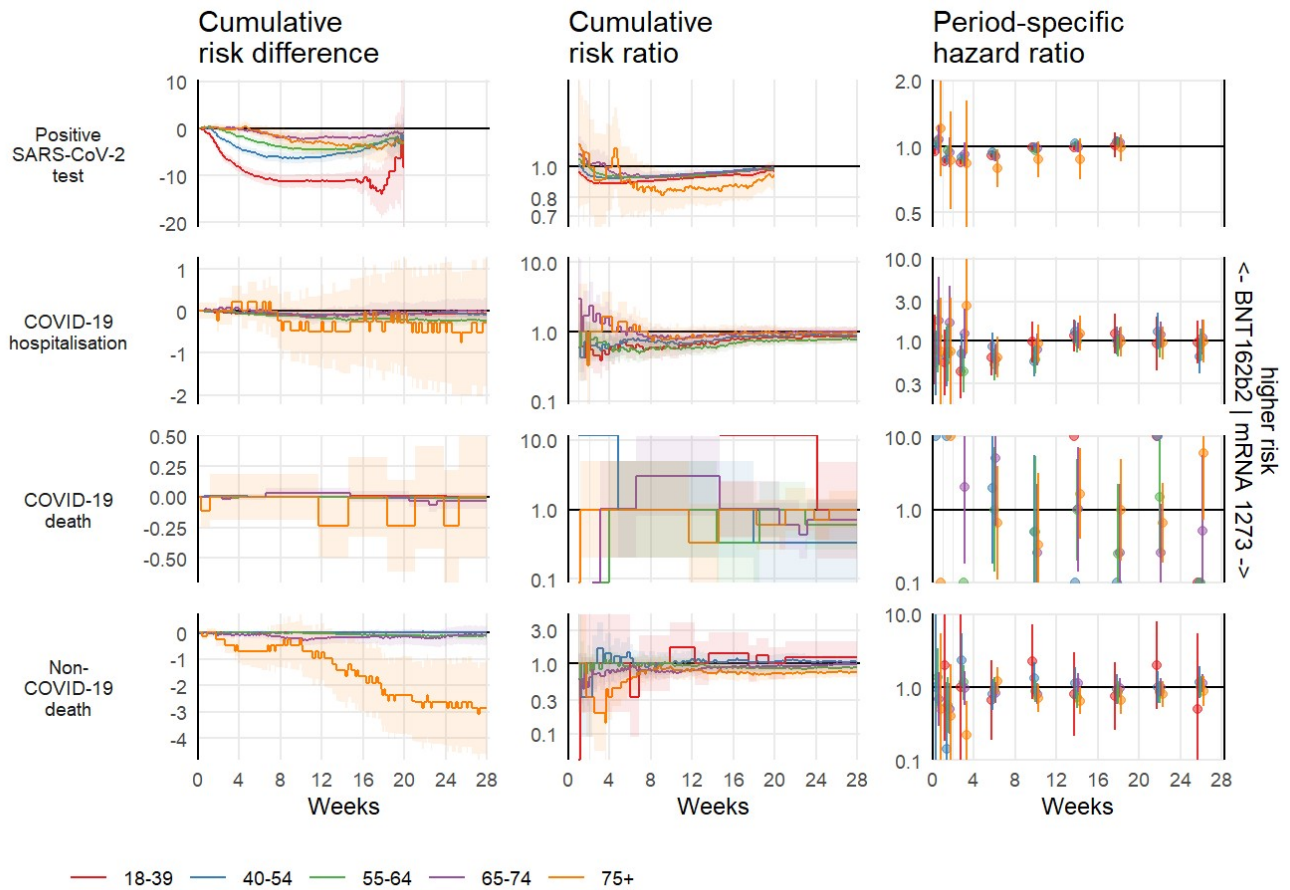

Figure S4d: Cumulative risk difference, cumulative risk ratio, and period-specific hazard ratios by prior infection status

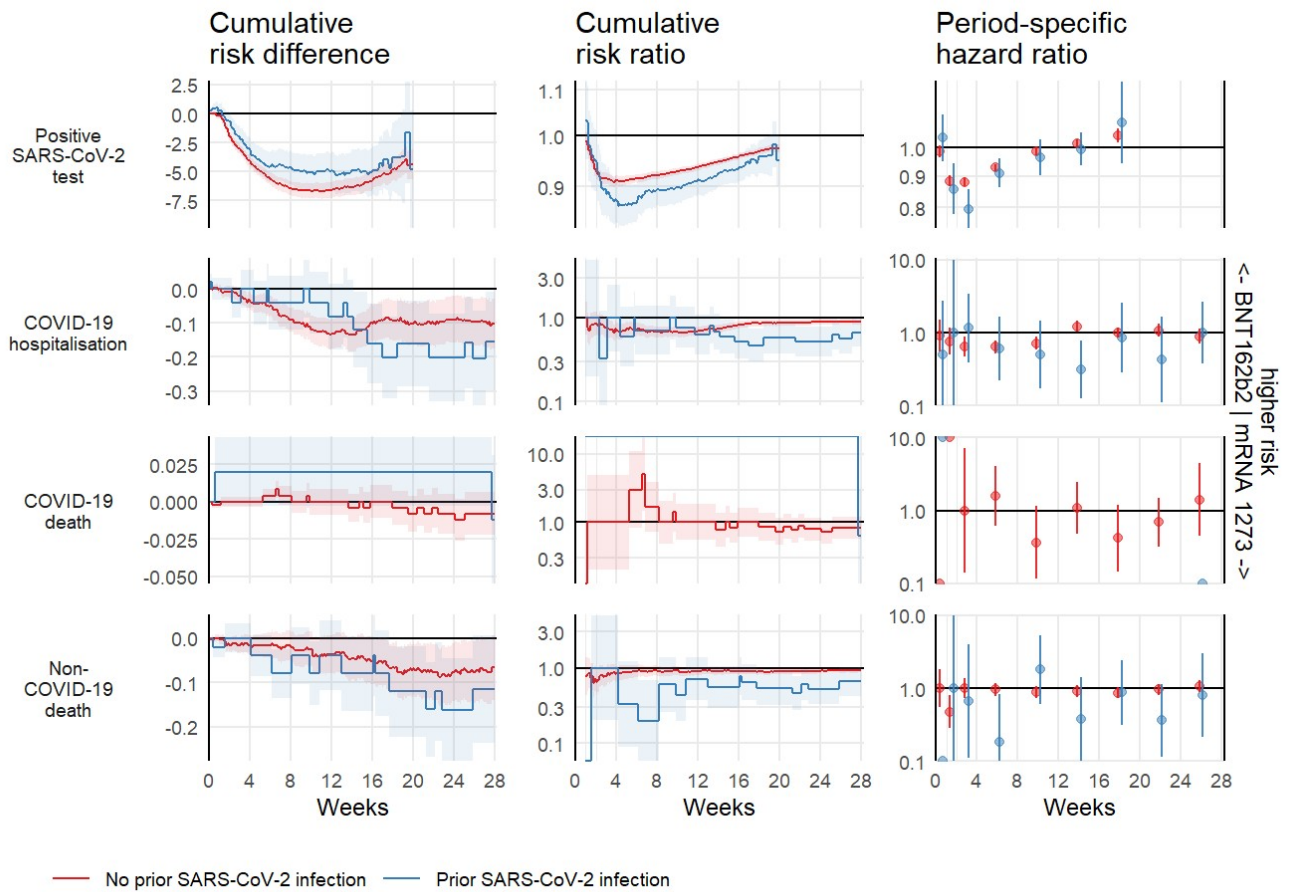

Figure S4e: Cumulative risk difference, cumulative risk ratio, and period-specific hazard ratios by clinical vulnerability

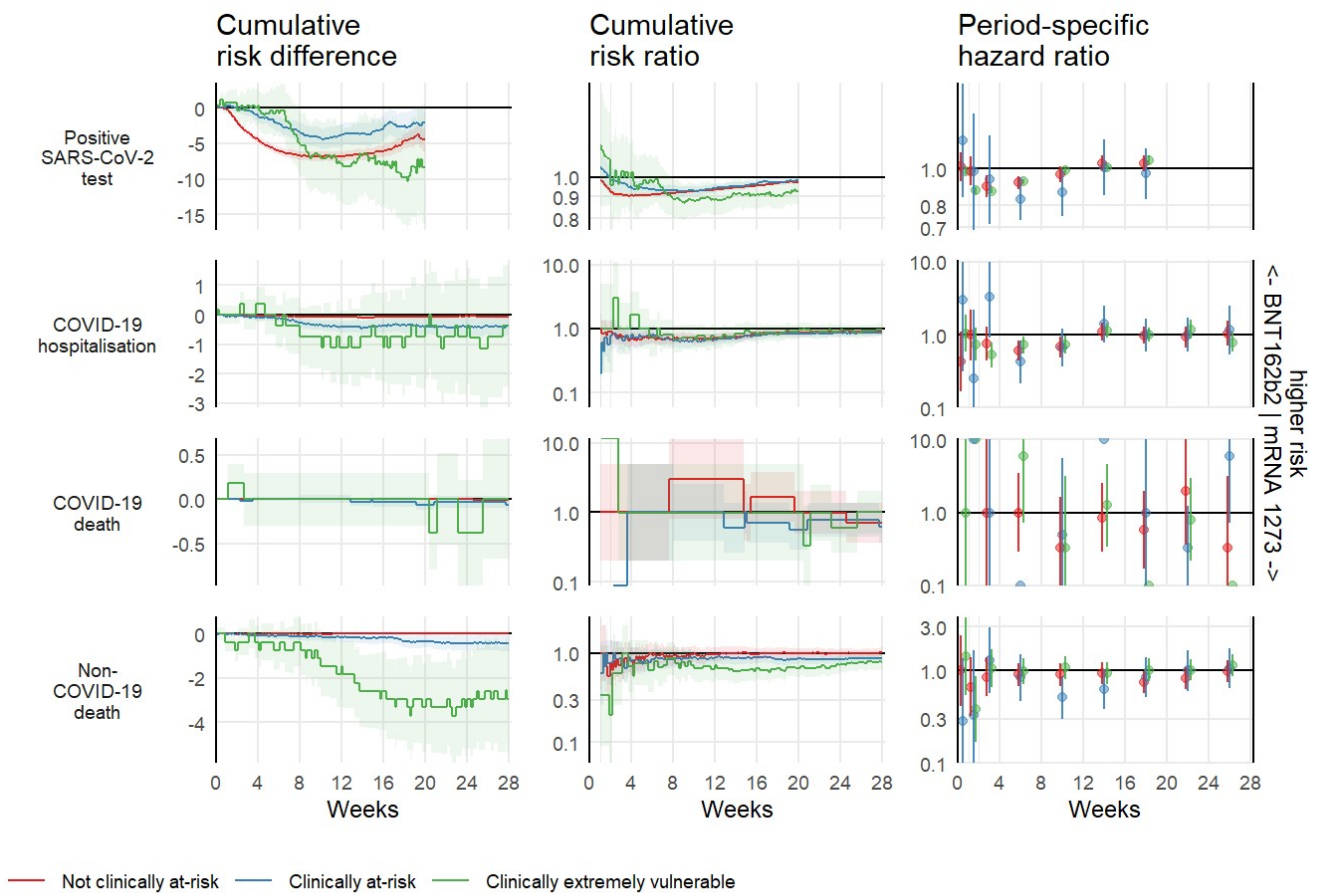

# Era-specific comparative effectiveness

Figure S5: 20-week Cox hazard ratios by variant era

Delta is defined as days up to 14 December 2021. Omicron is defined as day from 15 December 2021 onwards.

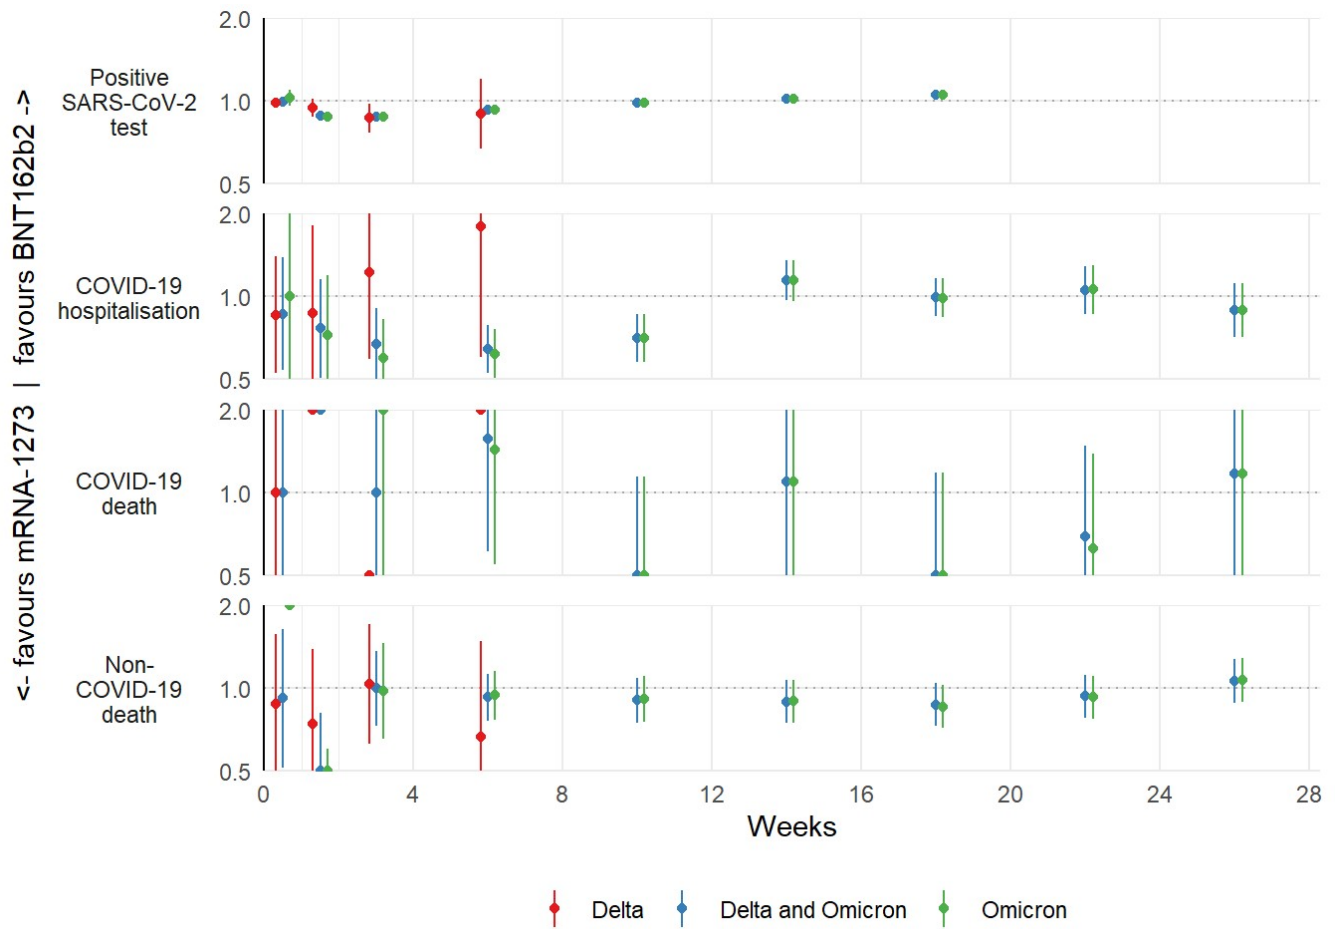

Table S5: 20-week Cox hazard ratios by variant era

Delta is defined as days up to 14 December 2021. Omicron is defined as day from 15 December 2021 onwards.

| Time since boosting             | Delta and Omicron   | Delta               | Omicron             |
|---------------------------------|---------------------|---------------------|---------------------|
| <b>Positive SARS-CoV-2 test</b> |                     |                     |                     |
| 1 - 7                           | 0.99 (0.97 to 1.01) | 0.98 (0.96 to 1.01) | 1.03 (0.96 to 1.10) |
| 8 - 14                          | 0.88 (0.86 to 0.90) | 0.95 (0.88 to 1.02) | 0.88 (0.86 to 0.90) |
| 15 - 28                         | 0.88 (0.86 to 0.89) | 0.86 (0.76 to 0.98) | 0.87 (0.86 to 0.89) |
| 29 - 56                         | 0.93 (0.92 to 0.94) | 0.90 (0.67 to 1.20) | 0.93 (0.92 to 0.94) |
| 57 - 84                         | 0.98 (0.97 to 1.00) | NA (NA to NA)       | 0.99 (0.97 to 1.00) |
| 85 - 112                        | 1.01 (1.00 to 1.03) | NA (NA to NA)       | 1.01 (1.00 to 1.03) |
| 113 - 140                       | 1.05 (1.02 to 1.07) | NA (NA to NA)       | 1.05 (1.02 to 1.07) |
| <b>COVID-19 hospitalisation</b> |                     |                     |                     |
| 1 - 7                           | 0.86 (0.54 to 1.39) | 0.86 (0.53 to 1.40) | 1.00 (0.14 to 7.10) |
| 8 - 14                          | 0.76 (0.50 to 1.16) | 0.87 (0.41 to 1.82) | 0.72 (0.44 to 1.20) |



| Time since boosting       | Delta and Omicron    | Delta                     | Omicron              |
|---------------------------|----------------------|---------------------------|----------------------|
| 15 - 28                   | 0.67 (0.50 to 0.91)  | 1.23 (0.59 to 2.56)       | 0.60 (0.43 to 0.83)  |
| 29 - 56                   | 0.64 (0.53 to 0.79)  | 1.80 (0.60 to 5.37)       | 0.62 (0.50 to 0.76)  |
| 57 - 84                   | 0.71 (0.58 to 0.87)  | NA (NA to NA)             | 0.71 (0.58 to 0.86)  |
| 85 - 112                  | 1.15 (0.97 to 1.35)  | NA (NA to NA)             | 1.14 (0.96 to 1.35)  |
| 113 - 140                 | 0.99 (0.85 to 1.17)  | NA (NA to NA)             | 0.99 (0.84 to 1.16)  |
| 141 - 168                 | 1.06 (0.86 to 1.29)  | NA (NA to NA)             | 1.06 (0.87 to 1.30)  |
| 169 - 196                 | 0.89 (0.71 to 1.12)  | NA (NA to NA)             | 0.89 (0.71 to 1.12)  |
| <b>COVID-19 death</b>     |                      |                           |                      |
| 1 - 7                     | 1.00 (0.06 to 15.99) | 1.00 (0.06 to 15.99)      | NA (NA to NA)        |
| 8 - 14                    | Inf (Inf to Inf)     | Inf (Inf to Inf)          | NA (NA to NA)        |
| 15 - 28                   | 1.00 (0.14 to 7.10)  | 0.0000 (0.0000 to 0.0000) | 2.00 (0.18 to 22.06) |
| 29 - 56                   | 1.57 (0.61 to 4.05)  | Inf (Inf to Inf)          | 1.43 (0.54 to 3.75)  |
| 57 - 84                   | 0.36 (0.12 to 1.14)  | NA (NA to NA)             | 0.36 (0.12 to 1.14)  |
| 85 - 112                  | 1.09 (0.48 to 2.47)  | NA (NA to NA)             | 1.09 (0.48 to 2.47)  |
| 113 - 140                 | 0.42 (0.15 to 1.18)  | NA (NA to NA)             | 0.42 (0.15 to 1.18)  |
| 141 - 168                 | 0.69 (0.32 to 1.48)  | NA (NA to NA)             | 0.63 (0.28 to 1.38)  |
| 169 - 196                 | 1.17 (0.39 to 3.48)  | NA (NA to NA)             | 1.17 (0.39 to 3.47)  |
| <b>Non-COVID-19 death</b> |                      |                           |                      |
| 1 - 7                     | 0.92 (0.51 to 1.63)  | 0.88 (0.49 to 1.57)       | Inf (Inf to Inf)     |
| 8 - 14                    | 0.49 (0.29 to 0.81)  | 0.74 (0.39 to 1.38)       | 0.23 (0.09 to 0.60)  |
| 15 - 28                   | 1.00 (0.73 to 1.37)  | 1.03 (0.63 to 1.71)       | 0.98 (0.65 to 1.46)  |
| 29 - 56                   | 0.93 (0.76 to 1.13)  | 0.67 (0.30 to 1.48)       | 0.94 (0.77 to 1.16)  |
| 57 - 84                   | 0.90 (0.75 to 1.09)  | NA (NA to NA)             | 0.91 (0.75 to 1.11)  |
| 85 - 112                  | 0.89 (0.74 to 1.07)  | NA (NA to NA)             | 0.89 (0.75 to 1.07)  |
| 113 - 140                 | 0.87 (0.73 to 1.04)  | NA (NA to NA)             | 0.86 (0.72 to 1.03)  |
| 141 - 168                 | 0.93 (0.78 to 1.12)  | NA (NA to NA)             | 0.93 (0.77 to 1.11)  |
| 169 - 196                 | 1.06 (0.88 to 1.27)  | NA (NA to NA)             | 1.07 (0.89 to 1.29)  |

## Estimands

The target estimand(s) is defined as the risk difference at 20 weeks of each outcome between those receiving a Moderna booster dose compared with a Pfizer booster dose, in those eligible and matched according to the stated eligibility and matching criteria. We also report the corresponding risk ratios and period-specific hazard ratios. None of the people in either group were excluded due to non-compliance; everybody received their assigned exposure of booster vaccination, a point-treatment with no possibility for discontinuation once administered. The per-protocol effect therefore coincides with the intention-to-treat effect.

## JCVI priority groups

The Joint Committee on Vaccine and Immunisation (JCVI) priority groups were defined as follows:

| <b>Priority group</b> | <b>Description</b>                                                                        |
|-----------------------|-------------------------------------------------------------------------------------------|
| 1                     | Residents in a care home for older adults<br>Staff working in care homes for older adults |
| 2                     | All those 80 years of age and over<br>Frontline health and social care workers            |
| 3                     | All those 75-79 years of age                                                              |
| 4                     | All those 70-74 years of age<br>Individuals aged 16-69 in a high risk group               |
| 5                     | All those 65-69 years of age                                                              |
| 6                     | Adults aged 16-64 years in an at-risk group                                               |
| 7                     | All those 60-64 years of age                                                              |
| 8                     | All those 55-59 years of age                                                              |
| 9                     | All those 50-54 years of age                                                              |
| 10a                   | All those 40-49 years of age                                                              |
| 10b                   | All those 18-39 years of age                                                              |

See original priority groups here:

[https://assets.publishing.service.gov.uk/government/uploads/system/uploads/attachment\\_data/file/1007737/Greenbook\\_chapter\\_14a\\_30July2021.pdf#page=15](https://assets.publishing.service.gov.uk/government/uploads/system/uploads/attachment_data/file/1007737/Greenbook_chapter_14a_30July2021.pdf#page=15) See revised priority groups here: <https://www.england.nhs.uk/coronavirus/wp-content/uploads/sites/52/2021/07/C1327-covid-19-vaccination-autumn-winter-phase-3-planning.pdf>

Note that we excluded care home residents and health care workers in our analysis, so members of JCVI group 1 are not included and JCVI group 2 includes only those aged 80

and over. The original priority group list has 9 groups, with a 10th group implicitly defined as “everybody else”. Here we explicitly define this group, and split into two (10a and 10b) because of the earlier booster eligibility in the 40-49 group from 15 November 2021 onwards. (<https://www.gov.uk/government/news/jcvi-issues-advice-on-covid-19-booster-vaccines-for-those-aged-40-to-49-and-second-doses-for-16-to-17-year-olds>)

## Codelists and variable definitions

All codelists can be found at <https://codelists.opensafely.org/codelist/<ID>>, substituting <ID> for the codelist identifier in the table below.

Further details of how these codes are combined are available in the [project study definition](#), and subsequent analysis R scripts.

| Variable                                      | Data source                                                             | Notes                                                                                                                                                                                                                                                                                                                                                                                              | Values                                                                                                 | Codelist identifier                                                                                                                                                 |
|-----------------------------------------------|-------------------------------------------------------------------------|----------------------------------------------------------------------------------------------------------------------------------------------------------------------------------------------------------------------------------------------------------------------------------------------------------------------------------------------------------------------------------------------------|--------------------------------------------------------------------------------------------------------|---------------------------------------------------------------------------------------------------------------------------------------------------------------------|
| <b>Demographics</b>                           |                                                                         |                                                                                                                                                                                                                                                                                                                                                                                                    |                                                                                                        |                                                                                                                                                                     |
| Sex                                           | Primary care record                                                     |                                                                                                                                                                                                                                                                                                                                                                                                    | Male;<br>Female                                                                                        |                                                                                                                                                                     |
| Age                                           | Primary care record                                                     |                                                                                                                                                                                                                                                                                                                                                                                                    | >=18                                                                                                   |                                                                                                                                                                     |
| Ethnicity                                     | Primary care record; SUS-APCS                                           | Taken from primary care record where known, and supplemented by SUS-APCS data where unknown                                                                                                                                                                                                                                                                                                        | Black;<br>Mixed;<br>South Asian;<br>White; Other                                                       | opensafely/ethnicity/2020-04-27/                                                                                                                                    |
| NHS region                                    | Primary care record                                                     |                                                                                                                                                                                                                                                                                                                                                                                                    | East;<br>London;<br>Midlands;<br>North East and Yorkshire;<br>North West;<br>South East;<br>South West |                                                                                                                                                                     |
| Sustainability and Transformation Partnership | Primary care record                                                     | GPs are nested within STPs, so is taken from practice, not patient address.                                                                                                                                                                                                                                                                                                                        | One of 36 STPs                                                                                         |                                                                                                                                                                     |
| English Index of Multiple Deprivation         | Primary care record                                                     | Derived from Middle Layer Super Output Area (LSOA) of patient's address and using 2019 LSOA rankings                                                                                                                                                                                                                                                                                               | Grouped into 5 categories by quintile of IMD rank                                                      |                                                                                                                                                                     |
| Care home residency                           | Primary care record; Care and Quality Commission care home address data | Patients were considered to be care-home residents if they met any one of three criteria used to identify care homes. These criteria are based on either patient address, household age and size, or coded clinical events. See <a href="https://wellcomeopenresearch.org/articles/6-90/v1">https://wellcomeopenresearch.org/articles/6-90/v1</a> for more details on how these flags are derived. | 0/1                                                                                                    | primis-covid19-vacc-uptake/longres/v1<br>primis-covid19-vacc-uptake/carehome/v1<br>primis-covid19-vacc-uptake/nursehome/v1<br>primis-covid19-vacc-uptake/domcare/v1 |
| Health and social care worker status          | NIMS                                                                    | Vaccinees were asked if they were a health care worker or carer at the time of vaccination.                                                                                                                                                                                                                                                                                                        | 0/1                                                                                                    |                                                                                                                                                                     |
| <b>Clinical</b>                               |                                                                         |                                                                                                                                                                                                                                                                                                                                                                                                    |                                                                                                        |                                                                                                                                                                     |
| Severe obesity                                | Primary care record                                                     | BMI >= 40, based on most recent weight measurement, or clinically coded severe obesity                                                                                                                                                                                                                                                                                                             | 0/1                                                                                                    | primis-covid19-vacc-uptake/sev_obesity/v1.2<br>primis-covid19-vacc-uptake/bmi_stage/v1.2<br>primis-covid19-vacc-uptake/bmi/v1                                       |
| Asthma                                        | Primary care record                                                     | Based on PRIMIS specification                                                                                                                                                                                                                                                                                                                                                                      | 0/1                                                                                                    | primis-covid19-vacc-uptake/ast/v1<br>primis-covid19-vacc-uptake/astadm/v1<br>primis-covid19-vacc-uptake/astrx/v1                                                    |
| Chronic respiratory disease                   | Primary care record                                                     | Based on PRIMIS specification                                                                                                                                                                                                                                                                                                                                                                      | 0/1                                                                                                    | primis-covid19-vacc-uptake/resp_cov/v1                                                                                                                              |
| Chronic heart disease                         | Primary care record                                                     | Based on PRIMIS specification                                                                                                                                                                                                                                                                                                                                                                      | 0/1                                                                                                    | primis-covid19-vacc-uptake/chd_cov/v1.2.1                                                                                                                           |
| Chronic kidney disease                        | Primary care record                                                     | Based on PRIMIS specification                                                                                                                                                                                                                                                                                                                                                                      | 0/1                                                                                                    | primis-covid19-vacc-uptake/ckd_cov/v1.2.1<br>primis-covid19-vacc-uptake/ckd15/v1<br>primis-covid19-vacc-uptake/ckd35/v1                                             |
| Chronic liver disease                         | Primary care record                                                     | Based on PRIMIS specification                                                                                                                                                                                                                                                                                                                                                                      | 0/1                                                                                                    | primis-covid19-vacc-uptake/cld/v1                                                                                                                                   |
| Diabetes                                      | Primary care record                                                     | Based on PRIMIS specification                                                                                                                                                                                                                                                                                                                                                                      | 0/1                                                                                                    | primis-covid19-vacc-uptake/dmres/v1<br>primis-covid19-vacc-uptake/diab/v1                                                                                           |

|                                 |                            |                                                                                                                                                                                                                                                                                                                                                                                              |                                       |                                                                                                                                                                                                                                          |
|---------------------------------|----------------------------|----------------------------------------------------------------------------------------------------------------------------------------------------------------------------------------------------------------------------------------------------------------------------------------------------------------------------------------------------------------------------------------------|---------------------------------------|------------------------------------------------------------------------------------------------------------------------------------------------------------------------------------------------------------------------------------------|
| Chronic neurological disease    | Primary care record        | Based on PRIMIS specification                                                                                                                                                                                                                                                                                                                                                                | 0/1                                   | primis-covid19-vacc-uptake/cns_cov/v1                                                                                                                                                                                                    |
| Immunosuppressed                | Primary care record        | Based on PRIMIS specification                                                                                                                                                                                                                                                                                                                                                                | 0/1                                   | primis-covid19-vacc-uptake/immdx_cov/v1                                                                                                                                                                                                  |
| Immunosuppressive medications   | Primary care record        | Based on PRIMIS specification, within the last 6 months                                                                                                                                                                                                                                                                                                                                      | 0/1                                   | primis-covid19-vacc-uptake/immdx/v1                                                                                                                                                                                                      |
| Asplenia                        | Primary care record        | Based on PRIMIS specification                                                                                                                                                                                                                                                                                                                                                                | 0/1                                   | primis-covid19-vacc-uptake/spln_cov/v1/                                                                                                                                                                                                  |
| Cancer, non-haematological      | Primary care record        | Within the last 3 years                                                                                                                                                                                                                                                                                                                                                                      | 0/1                                   | opensafely/cancer-excluding-lung-and-haematological-snomed/2020-04-15/<br>opensafely/lung-cancer-snomed/2020-04-15/<br>opensafely/chemotherapy-or-radiotherapy-snomed/2020-04-15/<br>opensafely/haematological-cancer-snomed/2020-04-15/ |
| Cancer, haematological          | Primary care record        | Within the last 3 years                                                                                                                                                                                                                                                                                                                                                                      | 0/1                                   | opensafely/haematological-cancer-snomed/2020-04-15/                                                                                                                                                                                      |
| Solid organ transplantation     | Primary care record        |                                                                                                                                                                                                                                                                                                                                                                                              | 0/1                                   | opensafely/solid-organ-transplantation-snomed/2020-04-10/                                                                                                                                                                                |
| HIV/AIDS                        | Primary care record        |                                                                                                                                                                                                                                                                                                                                                                                              | 0/1                                   | nhsd/hiv-aids-snomed/68ca529e/                                                                                                                                                                                                           |
| Severe mental illness           | Primary care record        | Based on PRIMIS specification                                                                                                                                                                                                                                                                                                                                                                | 0/1                                   | primis-covid19-vacc-uptake/sev_mental/v1                                                                                                                                                                                                 |
| Learning disabilities           | Primary care record        | Based on PRIMIS specification                                                                                                                                                                                                                                                                                                                                                                | 0/1                                   | primis-covid19-vacc-uptake/smhres/v1                                                                                                                                                                                                     |
| End-of-life care                | Primary care record        | Based on codes indicating participation in end-of-life or palliative care pathways, or Midazolam prescriptions                                                                                                                                                                                                                                                                               | 0/1                                   | primis-covid19-vacc-uptake/learnedis/v1                                                                                                                                                                                                  |
| Housebound                      | Primary care record        |                                                                                                                                                                                                                                                                                                                                                                                              | 0/1                                   | nhsd-primary-care-domain-refsets/palcare_cod/5fce98cf<br>opensafely/midazolam-end-of-life/4c1b3c89                                                                                                                                       |
| Clinically extremely vulnerable | Primary care record        | Based on PRIMIS specification. This is also known as the Shielding list                                                                                                                                                                                                                                                                                                                      | 0/1                                   | opensafely/housebound/5bc77310                                                                                                                                                                                                           |
| Clinically at-risk              | Primary care record        | immunosuppressed; asplenia; chronic heart disease; chronic kidney disease; chronic liver disease; diabetes; chronic respiratory disease; asthma; chronic neurological disease; learning disabilities; severe mental illness                                                                                                                                                                  | 0/1                                   | primis-covid19-vacc-uptake/carehome/v1                                                                                                                                                                                                   |
| Comorbidity count               | Primary care record        | Count of: severe obesity; chronic heart disease; chronic kidney disease; chronic liver disease; diabetes; chronic respiratory disease OR asthma; chronic neurological disease                                                                                                                                                                                                                | >=0                                   | opensafely/no-longer-housebound/29a88ca6                                                                                                                                                                                                 |
| In-hospital status, planned     | SUS-APCS                   | With admission method in ["11", "12", "13", "81"]                                                                                                                                                                                                                                                                                                                                            | Date                                  | primis-covid19-vacc-uptake/shield/v1                                                                                                                                                                                                     |
| In-hospital status, unplanned   | SUS-APCS                   | With admission method in ["21", "22", "23", "24", "25", "2A", "2B", "2C", "2D", "28"]                                                                                                                                                                                                                                                                                                        | Date                                  | primis-covid19-vacc-uptake/nonshield/v1                                                                                                                                                                                                  |
| <b>Vaccination</b>              |                            |                                                                                                                                                                                                                                                                                                                                                                                              |                                       |                                                                                                                                                                                                                                          |
| Vaccination status              | NIMS / Primary care record | Vaccination details are recorded in the National Immunisation Management Service (NIMS) and transmitted to the patient's GP record within days. Vaccination status can be identified from by the vaccine product name. Vaccine cardinality (i.e., first dose, second etc) is identified by vaccine dates, rather than explicit clinical coding. There is no way to unambiguously distinguish | Date + BNT162b2; ChAdOx1-S; mRNA-1273 |                                                                                                                                                                                                                                          |

|                                         |                      |                                                                                                                                                                                                                                                                                                         |      |                                                                                                                                                                                                                                                                                                                                                                                                                                                                                                                                                                                                                                 |
|-----------------------------------------|----------------------|---------------------------------------------------------------------------------------------------------------------------------------------------------------------------------------------------------------------------------------------------------------------------------------------------------|------|---------------------------------------------------------------------------------------------------------------------------------------------------------------------------------------------------------------------------------------------------------------------------------------------------------------------------------------------------------------------------------------------------------------------------------------------------------------------------------------------------------------------------------------------------------------------------------------------------------------------------------|
|                                         |                      | “third primary dose” and “first booster dose” as the indication for vaccination is not recorded in the vaccine record. This must be inferred by vaccine date and clinical characteristics of the patient.                                                                                               |      |                                                                                                                                                                                                                                                                                                                                                                                                                                                                                                                                                                                                                                 |
| <b>COVID-19 events</b>                  |                      |                                                                                                                                                                                                                                                                                                         |      |                                                                                                                                                                                                                                                                                                                                                                                                                                                                                                                                                                                                                                 |
| Probable COVID-19                       | Primary care record  | Exact dates of COVID-19 infection / disease in primary care records are unreliable. This variable is only used to determine historical infection prior to the study start date. Important due to low availability of testing early in the pandemic                                                      | Date | <a href="https://opensafely.org/covid-identification-in-primary-care-probable-covid-positive-test/2020-07-16/">opensafely/covid-identification-in-primary-care-probable-covid-positive-test/2020-07-16/</a><br><a href="https://opensafely.org/covid-identification-in-primary-care-probable-covid-clinical-code/2020-07-16/">opensafely/covid-identification-in-primary-care-probable-covid-clinical-code/2020-07-16/</a><br><a href="https://opensafely.org/covid-identification-in-primary-care-probable-covid-sequelae/2020-07-16/">opensafely/covid-identification-in-primary-care-probable-covid-sequelae/2020-07-16/</a> |
| SARS-CoV-2 positive test                | SGSS                 | Any positive SARS-CoV-2 test, whether PCR or LFT. Swab date is used as the event date, not the date that the result was recorded.                                                                                                                                                                       | Date |                                                                                                                                                                                                                                                                                                                                                                                                                                                                                                                                                                                                                                 |
| Count of prior tests in previous x days | SGSS                 | The number of SARS-CoV-2 tests, whether PCR or LFT, recorded x days prior to booster vaccination. Swab date is used as the event date, not the date that the result was recorded.                                                                                                                       | >=0  |                                                                                                                                                                                                                                                                                                                                                                                                                                                                                                                                                                                                                                 |
| COVID-19 A&E attendances                | SUS-ECDS             | Any registered attendance to A&E with COVID-19 ICD10 codes mentioned anywhere in the “discharge diagnosis” field (not just the primary diagnosis)                                                                                                                                                       | Date | <a href="https://opensafely.org/covid-identification/2020-06-03/">opensafely/covid-identification/2020-06-03/</a>                                                                                                                                                                                                                                                                                                                                                                                                                                                                                                               |
| COVID-19 Hospital admissions            | SUS-APCS             | Any (completed) hospital episode with COVID-19 ICD10 codes mentioned anywhere in the diagnosis field (not just the primary diagnosis), and with admission method in ["21", "22", "23", "24", "25", "2A", "2B", "2C", "2D", "28"]                                                                        | Date | <a href="https://opensafely.org/covid-identification/2020-06-03/">opensafely/covid-identification/2020-06-03/</a>                                                                                                                                                                                                                                                                                                                                                                                                                                                                                                               |
| COVID-19 death                          | Death register (ONS) | Deaths with COVID-19 ICD10 diagnosis codes mentioned anywhere on the death certificate (not just underlying cause)                                                                                                                                                                                      | Date | <a href="https://opensafely.org/covid-identification/2020-06-03/">opensafely/covid-identification/2020-06-03/</a>                                                                                                                                                                                                                                                                                                                                                                                                                                                                                                               |
| Prior COVID-19 event within x days      | (derived)            | Any SARS-CoV-2 positive test, COVID-19 hospital admissions, or COVID-19 A&E attendances occurring within x days of booster vaccination. Note, we do not use “probable covid in primary care” to derive this variable as the entry date for this code may not reflect the date of the infection episode. | 0/1  |                                                                                                                                                                                                                                                                                                                                                                                                                                                                                                                                                                                                                                 |
| Prior COVID-19 event ever               | (derived)            | Any SARS-CoV-2 positive test, COVID-19 hospital admissions, COVID-19 A&E attendances or Probable COVID-19 as recorded in primary care, occurring before booster vaccination.                                                                                                                            | 0/1  |                                                                                                                                                                                                                                                                                                                                                                                                                                                                                                                                                                                                                                 |
| Death                                   | Death register (ONS) | Any death                                                                                                                                                                                                                                                                                               | Date |                                                                                                                                                                                                                                                                                                                                                                                                                                                                                                                                                                                                                                 |
